# Supplementary material
Source: PubMed Central journal article supplement (PMC5006734)
Supplement: ry151650suppa1.pdf [file ry151650suppa1.pdf]

**Table E1. Comparison of Cyst Location and Size between Patients with ADPKD and Control Subjects**

| Cyst Location and Size | Patients with ADPKD (n = 40) |               | Control Subjects (n = 25) |               | P Value |
|------------------------|------------------------------|---------------|---------------------------|---------------|---------|
|                        | No. of Patients              | No. of Cysts  | No. of Patients           | No. of Cysts  |         |
| Pancreatic head        | 13                           | 26            | 9                         | 11            | .68     |
| Pancreatic neck        | 4                            | 4             | 3                         | 10            | .81     |
| Pancreatic body        | 22                           | 44            | 10                        | 23            | .25     |
| Pancreatic tail        | 22                           | 47            | 15                        | 33            | .4      |
| Uncinate process       | 5                            | 10            | 1                         | 2             | .24     |
| Size (mm)*             | 3.4 (2.9–5.4)                | 3.4 (2.9–5.4) | 4.0 (3.0–6.1)             | 4.0 (3.0–6.1) | .72     |

\* Data are medians, with interquartile ranges in parentheses.

**Table E2. Comparison of Cyst Location and Size between 39 Patients with *PKD1* and *PKD2* Mutations and Pancreatic Cysts**

| Cyst Location and Size | <i>PKD1</i> (n = 19) |               | <i>PKD2</i> (n = 20) |               | P Value |
|------------------------|----------------------|---------------|----------------------|---------------|---------|
|                        | No. of Patients      | No. of Cysts  | No. of Patients      | No. of Cysts  |         |
| Pancreatic head        | 6                    | 8             | 7                    | 18            | .99     |
| Pancreatic neck        | 0                    | 0             | 4                    | 4             | .05     |
| Pancreatic body        | 10                   | 15            | 12                   | 29            | .52     |
| Pancreatic tail        | 10                   | 15            | 12                   | 32            | .89     |
| Uncinate process       | 1                    | 1             | 4                    | 9             | .23     |
| Size (mm)*             | 3.5 (3.0–5.3)        | 3.5 (3.0–5.3) | 3.0 (2.5–5.9)        | 3.0 (2.5–5.9) | .68     |

\* Data are medians, with interquartile ranges in parentheses.

**Table E3. Association between Pancreatic Cyst Properties and Mutation Characteristics**

| Patient Group and Parameter                 | Cyst Size* | Cyst Number* | Cysts Present <sup>†</sup> |
|---------------------------------------------|------------|--------------|----------------------------|
| <i>PKD1</i> group                           |            |              |                            |
| Mutation type (truncation vs nontruncation) | .34        | .63          | ...                        |
| Gene location (5' vs 3')                    | .45        | .56          | .56                        |

| PKD2 group                                  |     |     |     |
|---------------------------------------------|-----|-----|-----|
| Mutation type (truncation vs nontruncation) | .94 | .38 | ... |
| Gene location (5' vs 3')                    | .28 | .49 | .25 |

Note.—Data are *P* values.

\* The Wilcoxon rank sum test was used.

† The Fisher exact test was used.

**Table E4. Association between Follow-up Interval and Interval Change in 23 Patients with Pancreatic Cysts Who Underwent Follow-up MR Imaging (*P* = .02)**

| Interval Change of Pancreatic Cysts | No. of Patients | Median Follow-up Interval (y) |
|-------------------------------------|-----------------|-------------------------------|
| None                                | 14              | 2.0 (1.3–2.3)                 |
| Present*                            | 9               | 2.6 (2.4–4.3)                 |

Note.—Numbers in parentheses are interquartile ranges.

\* Includes any change in cyst size, number, or characteristics.
